# Supplementary material for: Mass evolution of the Antarctic Peninsula over the last two decades from a joint Bayesian inversion
Source: Copernicus journal article supplement (doi:10.5194/tc-2021-178), 2021-07-12
Supplement: Supplementary file 2 [file Supplementary_Data_1.xlsx]

## Sheet: README
DATASET S1 README
Author	Stephen Chuter
Institution	University of Bristol
Date Created	2021-06-09
Contact	s.chuter@bristol.ac.uk
Licence	Attribution 4.0 International (CC BY 4.0)
Dataset Description	Bayesian Heirarchical Model Ice sheet mass trend estimates and component latent processes for the Antarctic Peninsula and constituent drainage basins for the period 2003-2019. The data is used to produce Figures 3, 4 & 7. Mass trends are provided in the sheet name 'Mass_Trends'
Sheet No 1 - Mass Trends
Column Variable	Description
basin	Drianage Basin and Ice Sheet sectors for the mass trend as definied by the Ice Sheet Mass Balance Intercomparison (IMBIE) project (Rignot et al 2011, Rignot 2013). Drainage basin shapefile definitions available from: http://imbie.org/imbie-2016/drainage-basins/
year	Year of mass trend, years are stipualted as calendar years
smb_trend_gtyr	mass trend in surface mass balance processes (GT/yr)
smb_trend_sigma_gtyr	one sigma mass trend uncertainty in surface mass balance process(GT/yr)
ice_trend_gtyr	mass trend in ice dynamics mass balance processes (GT/yr)
ice_trend_sigma_gtyr	one sigma mass trend uncertainty in ice dynamics mass balance process(GT/yr)
totalmass_trend_gtyr	total basin mass trend (GT/yr)
totalmass_trend_sigma_gtyr	total basin mass trend uncertainty (GT/yr)
References
Rignot, E., J. Mouginot, and B. Scheuchl, 2011a. Antarctic Grounding Line Mapping from Differential Satellite Radar Interferometry, Geophysical Research Letters, 38, L10504, DOI: 10.1029/2011GL047109
Rignot, E., S. Jacobs, J. Mouginot, and B. Scheuchl, 2013. Ice Shelf Melting Around Antarctica. Science, 341(6143): 266-270. DOI: 10.1126/science.1235798

## Sheet: Mass_Trends
basin	year	smb_trend_gtyr	smb_trend_sigma_gtyr	ice_trend_gtyr	ice_trend_sigma_gtyr	totalmass_trend_gtyr	totalmass_trend_sigma_gtyr
AP_IMBIE	2003	-3.31279	2.15313	-4.97897	0.341967	-8.29175	2.13366
AP_IMBIE	2004	7.09339	1.72126	-8.92475	0.535207	-1.83136	1.66925
AP_IMBIE	2005	6.60847	1.71747	-12.1068	0.701659	-5.49834	1.64014
AP_IMBIE	2006	10.789	1.7645	-14.6763	0.837802	-3.88729	1.66646
AP_IMBIE	2007	-47.6965	1.82566	-16.7785	0.947797	-64.475	1.71276
AP_IMBIE	2008	28.3886	1.92833	-18.3488	1.03627	10.0399	1.80311
AP_IMBIE	2009	-29.7022	2.01691	-19.6785	1.1073	-49.3807	1.89278
AP_IMBIE	2010	13.3145	2.18014	-20.6952	1.16427	-7.38068	2.07804
AP_IMBIE	2011	-28.8574	2.01324	-21.5405	1.20985	-50.3978	1.87762
AP_IMBIE	2012	-2.49234	2.01207	-22.1401	1.24649	-24.6324	1.86735
AP_IMBIE	2013	-12.5712	2.00479	-22.5967	1.27601	-35.1679	1.85469
AP_IMBIE	2014	-6.29517	2.02271	-22.9344	1.2999	-29.2296	1.87606
AP_IMBIE	2015	3.60796	2.0299	-23.1774	1.31936	-19.5695	1.87902
AP_IMBIE	2016	48.4523	2.07187	-23.3556	1.33537	25.0967	1.94695
AP_IMBIE	2017	18.0774	3.16603	-23.619	1.3488	-5.54162	3.27016
AP_IMBIE	2018	4.77167	3.17479	-23.8416	1.35958	-19.0699	3.28058
AP_IMBIE	2019	-10.7831	2.15759	-24.0222	1.36822	-34.8052	2.01871
H_Hp	2003	-5.13692	1.36498	-1.13028	0.174783	-6.2672	1.37059
H_Hp	2004	0.70307	1.02561	-2.05398	0.267922	-1.35091	1.02972
H_Hp	2005	5.92962	0.984333	-2.79701	0.349029	3.13261	0.987133
H_Hp	2006	1.00612	1.01112	-3.39342	0.415625	-2.38729	1.01642
H_Hp	2007	-0.404264	1.04114	-3.87861	0.469594	-4.28287	1.04312
H_Hp	2008	10.3314	1.08213	-4.28239	0.513091	6.04896	1.08354
H_Hp	2009	-10.5626	1.20318	-4.65521	0.548031	-15.2178	1.2158
H_Hp	2010	2.48024	1.46806	-4.94307	0.575989	-2.46283	1.53512
H_Hp	2011	-7.93182	1.06278	-5.17974	0.598154	-13.1116	1.0746
H_Hp	2012	-5.03994	1.06193	-5.36198	0.615975	-10.4019	1.07179
H_Hp	2013	-6.24287	1.06636	-5.50337	0.630348	-11.7462	1.07558
H_Hp	2014	-4.08002	1.06914	-5.5985	0.641996	-9.67851	1.07769
H_Hp	2015	-1.35555	1.07284	-5.64458	0.65151	-7.00013	1.08169
H_Hp	2016	13.7915	1.08088	-5.66503	0.659385	8.12648	1.08973
H_Hp	2017	0.39206	1.39461	-5.72675	0.666036	-5.33469	1.45722
H_Hp	2018	-1.64702	1.39858	-5.76813	0.671499	-7.41515	1.45807
H_Hp	2019	3.80811	1.122	-5.78969	0.676048	-1.98158	1.10427
Hp_I	2003	-5.13931	1.55596	-1.03089	0.214794	-6.1702	1.54525
Hp_I	2004	8.24979	1.16663	-1.88385	0.326283	6.36594	1.12693
Hp_I	2005	14.9352	1.15504	-2.59326	0.424035	12.3419	1.08835
Hp_I	2006	13.8942	1.20298	-3.17931	0.504506	10.7149	1.11697
Hp_I	2007	-17.5366	1.24365	-3.67966	0.569745	-21.2163	1.14287
Hp_I	2008	8.09857	1.32602	-4.04368	0.622307	4.0549	1.21953
Hp_I	2009	-6.29732	1.44171	-4.36607	0.664514	-10.6634	1.34934
Hp_I	2010	1.02398	1.56234	-4.60889	0.698273	-3.58491	1.49608
Hp_I	2011	-15.6785	1.32094	-4.82103	0.725178	-20.4995	1.18236
Hp_I	2012	-3.90016	1.32603	-4.95965	0.746821	-8.85981	1.17893
Hp_I	2013	-10.4758	1.33595	-5.05007	0.764291	-15.5259	1.18383
Hp_I	2014	-5.18884	1.35172	-5.09138	0.77846	-10.2802	1.19743
Hp_I	2015	1.72494	1.35724	-5.10916	0.790047	-3.38423	1.20175
Hp_I	2016	27.9239	1.37843	-5.1103	0.799648	22.8136	1.23083
Hp_I	2017	6.65584	2.06119	-5.17382	0.807786	1.48202	2.05341
Hp_I	2018	-1.52659	2.06856	-5.23178	0.814489	-6.75837	2.05849
Hp_I	2019	-5.34018	1.41428	-5.27525	0.820075	-10.6154	1.2438
I_Ipp	2003	3.13568	1.55451	-3.76945	0.211949	-0.633769	1.55704
I_Ipp	2004	-2.5182	1.26205	-6.7229	0.344983	-9.24109	1.2747
I_Ipp	2005	-10.2215	1.2412	-9.08394	0.457103	-19.3055	1.2704
I_Ipp	2006	-5.36607	1.26844	-10.9672	0.548154	-16.3333	1.31341
I_Ipp	2007	-25.1651	1.30185	-12.4736	0.62147	-37.6388	1.36021
I_Ipp	2008	18.6246	1.37616	-13.6186	0.68034	5.00599	1.43817
I_Ipp	2009	-20.416	1.39568	-14.5711	0.727553	-34.9871	1.46697
I_Ipp	2010	13.4352	1.49957	-15.3047	0.765403	-1.86953	1.58804
I_Ipp	2011	-6.23638	1.4002	-15.9019	0.795695	-22.1383	1.49767
I_Ipp	2012	1.62346	1.38237	-16.3577	0.819992	-14.7342	1.48146
I_Ipp	2013	-1.60051	1.3555	-16.717	0.839517	-18.3175	1.4602
I_Ipp	2014	0.860068	1.35708	-17.0037	0.855282	-16.1437	1.4694
I_Ipp	2015	2.24713	1.35699	-17.2257	0.868063	-14.9785	1.47942
I_Ipp	2016	13.8665	1.3825	-17.4026	0.878515	-3.53605	1.51438
I_Ipp	2017	7.16025	1.765	-17.5905	0.887162	-10.4303	1.93987
I_Ipp	2018	4.32799	1.7739	-17.7459	0.894102	-13.4179	1.9485
I_Ipp	2019	-2.67762	1.48278	-17.8747	0.899669	-20.5523	1.59583
Ipp_J	2003	-1.30916	0.896539	-0.178623	0.197797	-1.48778	0.905626
Ipp_J	2004	1.3618	0.685371	-0.318004	0.322436	1.04379	0.72204
Ipp_J	2005	1.89479	0.67587	-0.42961	0.427354	1.46518	0.744261
Ipp_J	2006	2.26084	0.694821	-0.529797	0.512543	1.73104	0.795516
Ipp_J	2007	-4.99474	0.715071	-0.625206	0.581132	-5.61994	0.841244
Ipp_J	2008	1.66544	0.767531	-0.686469	0.636185	0.978975	0.911758
Ipp_J	2009	-2.98887	0.808725	-0.741335	0.680314	-3.7302	0.968754
Ipp_J	2010	-1.14463	0.861935	-0.7816	0.715651	-1.92623	1.02889
Ipp_J	2011	-6.94246	0.728504	-0.817498	0.743892	-7.75996	0.928228
Ipp_J	2012	-0.215643	0.726355	-0.822725	0.766534	-1.03837	0.933442
Ipp_J	2013	-0.494851	0.727932	-0.82964	0.784726	-1.32449	0.946213
Ipp_J	2014	-1.9664	0.734147	-0.839315	0.799372	-2.80571	0.961301
Ipp_J	2015	-0.364107	0.737452	-0.842611	0.8112	-1.20672	0.958769
Ipp_J	2016	6.66187	0.745443	-0.842698	0.820876	5.81918	0.986642
Ipp_J	2017	4.26129	0.999123	-0.854646	0.82883	3.40664	1.2553
Ipp_J	2018	1.97027	0.998899	-0.863853	0.835215	1.10642	1.25867
Ipp_J	2019	-2.76526	0.759844	-0.872238	0.840335	-3.6375	1.0043

## Sheet: Sheet2
	Column Labels
	Sum of std_trend			Sum of mean_trend			Total Sum of std_trend	Total Sum of mean_trend
Row Labels	BASIN_6_ICE	BASIN_6_SURF_FIRN	BASIN_6_TMASS	BASIN_6_ICE	BASIN_6_SURF_FIRN	BASIN_6_TMASS
0	0.211949	1.55451	1.55704	-3.76945	3.13568	-0.633769	3.3235	-1.26754
1	0.344983	1.26205	1.2747	-6.7229	-2.5182	-9.24109	2.88172	-18.4822
2	0.457103	1.2412	1.2704	-9.08394	-10.2215	-19.3055	2.9687	-38.6109
3	0.548154	1.26844	1.31341	-10.9672	-5.36607	-16.3333	3.13001	-32.6665
4	0.62147	1.30185	1.36021	-12.4736	-25.1651	-37.6388	3.28353	-75.2775
5	0.68034	1.37616	1.43817	-13.6186	18.6246	5.00599	3.49467	10.012
6	0.727553	1.39568	1.46697	-14.5711	-20.416	-34.9871	3.5902	-69.9743
7	0.765403	1.49957	1.58804	-15.3047	13.4352	-1.86953	3.85301	-3.73907
8	0.795695	1.4002	1.49767	-15.9019	-6.23638	-22.1383	3.69356	-44.2766
9	0.819992	1.38237	1.48146	-16.3577	1.62346	-14.7342	3.68382	-29.4685
10	0.839517	1.3555	1.4602	-16.717	-1.60051	-18.3175	3.65522	-36.6349
11	0.855282	1.35708	1.4694	-17.0037	0.860068	-16.1437	3.68176	-32.2873
12	0.868063	1.35699	1.47942	-17.2257	2.24713	-14.9785	3.70447	-29.9571
13	0.878515	1.3825	1.51438	-17.4026	13.8665	-3.53605	3.7754	-7.07211
14	0.887162	1.765	1.93987	-17.5905	7.16025	-10.4303	4.59204	-20.8606
15	0.894102	1.7739	1.9485	-17.7459	4.32799	-13.4179	4.61651	-26.8359
16	0.899669	1.48278	1.59583	-17.8747	-2.67762	-20.5523	3.97828	-41.1046
Grand Total	12.095	24.1558	25.6557	-240.331	-8.92054	-249.252	61.9064	-498.504

## Sheet: Sheet1
name	t	mean_trend	std_trend
ALL_SECTORS_TMASS_INCLUDING_ISLANDS	0	-63.9697	3.22018
ALL_SECTORS_SURFMASS_INCLUDING_ISLANDS	0	-31.744	3.35929
ALL_SECTORS_ICEMASS_INCLUDING_ISLANDS	0	-32.2257	1.00471
ALL_SECTORS_TMASS	0	-64.9123	3.07529
ALL_SECTORS_SURF_FIRN	0	-34.8126	3.24893
ALL_SECTORS_ICE	0	-30.0997	0.910281
AP_IMBIE_TMASS	0	-8.29175	2.13366
AP_IMBIE_SURF_FIRN	0	-3.31279	2.15313
AP_IMBIE_ICE	0	-4.97897	0.341967
BASIN_2_TMASS	0	0.607692	1.46737
BASIN_2_SURF_FIRN	0	-1.15167	1.54771
BASIN_2_ICE	0	1.75936	0.563884
BASIN_3_TMASS	0	-6.2672	1.37059
BASIN_3_SURF_FIRN	0	-5.13692	1.36498
BASIN_3_ICE	0	-1.13028	0.174783
BASIN_4_TMASS	0	-50.961	1.83899
BASIN_4_SURF_FIRN	0	-25.2112	1.97201
BASIN_4_ICE	0	-25.7498	0.551439
BASIN_5_TMASS	0	-6.1702	1.54525
BASIN_5_SURF_FIRN	0	-5.13931	1.55596
BASIN_5_ICE	0	-1.03089	0.214794
BASIN_6_TMASS	0	-0.633769	1.55704
BASIN_6_SURF_FIRN	0	3.13568	1.55451
BASIN_6_ICE	0	-3.76945	0.211949
BASIN_7_TMASS	0	-1.48778	0.905626
BASIN_7_SURF_FIRN	0	-1.30916	0.896539
BASIN_7_ICE	0	-0.178623	0.197797
BASIN_8_TMASS	0	0	0
BASIN_8_SURF_FIRN	0	0	0
BASIN_8_ICE	0	0	0
ALL_SECTORS_TMASS_INCLUDING_ISLANDS	1	-51.9177	2.70381
ALL_SECTORS_SURFMASS_INCLUDING_ISLANDS	1	4.42661	2.98756
ALL_SECTORS_ICEMASS_INCLUDING_ISLANDS	1	-56.3443	1.47121
ALL_SECTORS_TMASS	1	-60.0858	2.50609
ALL_SECTORS_SURF_FIRN	1	-7.57634	2.89947
ALL_SECTORS_ICE	1	-52.5094	1.28604
AP_IMBIE_TMASS	1	-1.83136	1.66925
AP_IMBIE_SURF_FIRN	1	7.09339	1.72126
AP_IMBIE_ICE	1	-8.92475	0.535207
BASIN_2_TMASS	1	15.4049	1.12392
BASIN_2_SURF_FIRN	1	10.9016	1.27894
BASIN_2_ICE	1	4.50324	0.659945
BASIN_3_TMASS	1	-1.35091	1.02972
BASIN_3_SURF_FIRN	1	0.70307	1.02561
BASIN_3_ICE	1	-2.05398	0.267922
BASIN_4_TMASS	1	-72.3084	1.47243
BASIN_4_SURF_FIRN	1	-26.2744	1.79678
BASIN_4_ICE	1	-46.034	0.820867
BASIN_5_TMASS	1	6.36594	1.12693
BASIN_5_SURF_FIRN	1	8.24979	1.16663
BASIN_5_ICE	1	-1.88385	0.326283
BASIN_6_TMASS	1	-9.24109	1.2747
BASIN_6_SURF_FIRN	1	-2.5182	1.26205
BASIN_6_ICE	1	-6.7229	0.344983
BASIN_7_TMASS	1	1.04379	0.72204
BASIN_7_SURF_FIRN	1	1.3618	0.685371
BASIN_7_ICE	1	-0.318004	0.322436
BASIN_8_TMASS	1	0	0
BASIN_8_SURF_FIRN	1	0	0
BASIN_8_ICE	1	0	0
ALL_SECTORS_TMASS_INCLUDING_ISLANDS	2	-18.9671	2.74299
ALL_SECTORS_SURFMASS_INCLUDING_ISLANDS	2	56.6417	3.13713
ALL_SECTORS_ICEMASS_INCLUDING_ISLANDS	2	-75.6087	1.89061
ALL_SECTORS_TMASS	2	-14.8666	2.46786
ALL_SECTORS_SURF_FIRN	2	55.5502	3.05127
ALL_SECTORS_ICE	2	-70.4168	1.63226
AP_IMBIE_TMASS	2	-5.49834	1.64014
AP_IMBIE_SURF_FIRN	2	6.60847	1.71747
AP_IMBIE_ICE	2	-12.1068	0.701659
BASIN_2_TMASS	2	16.0788	1.09475
BASIN_2_SURF_FIRN	2	9.44881	1.30974
BASIN_2_ICE	2	6.62996	0.765851
BASIN_3_TMASS	2	3.13261	0.987133
BASIN_3_SURF_FIRN	2	5.92962	0.984333
BASIN_3_ICE	2	-2.79701	0.349029
BASIN_4_TMASS	2	-28.5797	1.44132
BASIN_4_SURF_FIRN	2	33.5632	1.92814
BASIN_4_ICE	2	-62.1429	1.06044
BASIN_5_TMASS	2	12.3419	1.08835
BASIN_5_SURF_FIRN	2	14.9352	1.15504
BASIN_5_ICE	2	-2.59326	0.424035
BASIN_6_TMASS	2	-19.3055	1.2704
BASIN_6_SURF_FIRN	2	-10.2215	1.2412
BASIN_6_ICE	2	-9.08394	0.457103
BASIN_7_TMASS	2	1.46518	0.744261
BASIN_7_SURF_FIRN	2	1.89479	0.67587
BASIN_7_ICE	2	-0.42961	0.427354
BASIN_8_TMASS	2	0	0
BASIN_8_SURF_FIRN	2	0	0
BASIN_8_ICE	2	0	0
ALL_SECTORS_TMASS_INCLUDING_ISLANDS	3	-98.0986	2.83724
ALL_SECTORS_SURFMASS_INCLUDING_ISLANDS	3	-5.72663	3.31901
ALL_SECTORS_ICEMASS_INCLUDING_ISLANDS	3	-92.372	2.23848
ALL_SECTORS_TMASS	3	-95.6663	2.49513
ALL_SECTORS_SURF_FIRN	3	-9.58109	3.23911
ALL_SECTORS_ICE	3	-86.0852	1.92199
AP_IMBIE_TMASS	3	-3.88729	1.66646
AP_IMBIE_SURF_FIRN	3	10.789	1.7645
AP_IMBIE_ICE	3	-14.6763	0.837802
BASIN_2_TMASS	3	11.4957	1.10744
BASIN_2_SURF_FIRN	3	4.29378	1.3716
BASIN_2_ICE	3	7.20191	0.861396
BASIN_3_TMASS	3	-2.38729	1.01642
BASIN_3_SURF_FIRN	3	1.00612	1.01112
BASIN_3_ICE	3	-3.39342	0.415625
BASIN_4_TMASS	3	-100.887	1.44608
BASIN_4_SURF_FIRN	3	-25.67	2.07009
BASIN_4_ICE	3	-75.2174	1.25867
BASIN_5_TMASS	3	10.7149	1.11697
BASIN_5_SURF_FIRN	3	13.8942	1.20298
BASIN_5_ICE	3	-3.17931	0.504506
BASIN_6_TMASS	3	-16.3333	1.31341
BASIN_6_SURF_FIRN	3	-5.36607	1.26844
BASIN_6_ICE	3	-10.9672	0.548154
BASIN_7_TMASS	3	1.73104	0.795516
BASIN_7_SURF_FIRN	3	2.26084	0.694821
BASIN_7_ICE	3	-0.529797	0.512543
BASIN_8_TMASS	3	0	0
BASIN_8_SURF_FIRN	3	0	0
BASIN_8_ICE	3	0	0
ALL_SECTORS_TMASS_INCLUDING_ISLANDS	4	-190.847	2.9356
ALL_SECTORS_SURFMASS_INCLUDING_ISLANDS	4	-85.7017	3.48759
ALL_SECTORS_ICEMASS_INCLUDING_ISLANDS	4	-105.145	2.52112
ALL_SECTORS_TMASS	4	-179.881	2.5317
ALL_SECTORS_SURF_FIRN	4	-81.8968	3.4097
ALL_SECTORS_ICE	4	-97.9842	2.15832
AP_IMBIE_TMASS	4	-64.475	1.71276
AP_IMBIE_SURF_FIRN	4	-47.6965	1.82566
AP_IMBIE_ICE	4	-16.7785	0.947797
BASIN_2_TMASS	4	-7.84459	1.13232
BASIN_2_SURF_FIRN	4	-16.0655	1.43499
BASIN_2_ICE	4	8.22096	0.94236
BASIN_3_TMASS	4	-4.28287	1.04312
BASIN_3_SURF_FIRN	4	-0.404264	1.04114
BASIN_3_ICE	4	-3.87861	0.469594
BASIN_4_TMASS	4	-103.279	1.4508
BASIN_4_SURF_FIRN	4	-17.7304	2.19099
BASIN_4_ICE	4	-85.5481	1.41961
BASIN_5_TMASS	4	-21.2163	1.14287
BASIN_5_SURF_FIRN	4	-17.5366	1.24365
BASIN_5_ICE	4	-3.67966	0.569745
BASIN_6_TMASS	4	-37.6388	1.36021
BASIN_6_SURF_FIRN	4	-25.1651	1.30185
BASIN_6_ICE	4	-12.4736	0.62147
BASIN_7_TMASS	4	-5.61994	0.841244
BASIN_7_SURF_FIRN	4	-4.99474	0.715071
BASIN_7_ICE	4	-0.625206	0.581132
BASIN_8_TMASS	4	0	0
BASIN_8_SURF_FIRN	4	0	0
BASIN_8_ICE	4	0	0
ALL_SECTORS_TMASS_INCLUDING_ISLANDS	5	-57.0747	3.04467
ALL_SECTORS_SURFMASS_INCLUDING_ISLANDS	5	58.227	3.65044
ALL_SECTORS_ICEMASS_INCLUDING_ISLANDS	5	-115.302	2.74914
ALL_SECTORS_TMASS	5	-61.1989	2.597
ALL_SECTORS_SURF_FIRN	5	46.2288	3.57785
ALL_SECTORS_ICE	5	-107.428	2.34941
AP_IMBIE_TMASS	5	10.0399	1.80311
AP_IMBIE_SURF_FIRN	5	28.3886	1.92833
AP_IMBIE_ICE	5	-18.3488	1.03627
BASIN_2_TMASS	5	16.9618	1.17536
BASIN_2_SURF_FIRN	5	7.82529	1.50533
BASIN_2_ICE	5	9.13655	1.00941
BASIN_3_TMASS	5	6.04896	1.08354
BASIN_3_SURF_FIRN	5	10.3314	1.08213
BASIN_3_ICE	5	-4.28239	0.513091
BASIN_4_TMASS	5	-94.2495	1.46431
BASIN_4_SURF_FIRN	5	-0.31652	2.29681
BASIN_4_ICE	5	-93.933	1.54963
BASIN_5_TMASS	5	4.0549	1.21953
BASIN_5_SURF_FIRN	5	8.09857	1.32602
BASIN_5_ICE	5	-4.04368	0.622307
BASIN_6_TMASS	5	5.00599	1.43817
BASIN_6_SURF_FIRN	5	18.6246	1.37616
BASIN_6_ICE	5	-13.6186	0.68034
BASIN_7_TMASS	5	0.978975	0.911758
BASIN_7_SURF_FIRN	5	1.66544	0.767531
BASIN_7_ICE	5	-0.686469	0.636185
BASIN_8_TMASS	5	0	0
BASIN_8_SURF_FIRN	5	0	0
BASIN_8_ICE	5	0	0
ALL_SECTORS_TMASS_INCLUDING_ISLANDS	6	-273.248	3.13838
ALL_SECTORS_SURFMASS_INCLUDING_ISLANDS	6	-149.372	3.78603
ALL_SECTORS_ICEMASS_INCLUDING_ISLANDS	6	-123.876	2.93256
ALL_SECTORS_TMASS	6	-254.774	2.66414
ALL_SECTORS_SURF_FIRN	6	-139.33	3.72176
ALL_SECTORS_ICE	6	-115.443	2.50343
AP_IMBIE_TMASS	6	-49.3807	1.89278
AP_IMBIE_SURF_FIRN	6	-29.7022	2.01691
AP_IMBIE_ICE	6	-19.6785	1.1073
BASIN_2_TMASS	6	-18.0121	1.29961
BASIN_2_SURF_FIRN	6	-27.6333	1.62765
BASIN_2_ICE	6	9.62116	1.06457
BASIN_3_TMASS	6	-15.2178	1.2158
BASIN_3_SURF_FIRN	6	-10.5626	1.20318
BASIN_3_ICE	6	-4.65521	0.548031
BASIN_4_TMASS	6	-172.163	1.52943
BASIN_4_SURF_FIRN	6	-71.4324	2.41409
BASIN_4_ICE	6	-100.73	1.65446
BASIN_5_TMASS	6	-10.6634	1.34934
BASIN_5_SURF_FIRN	6	-6.29732	1.44171
BASIN_5_ICE	6	-4.36607	0.664514
BASIN_6_TMASS	6	-34.9871	1.46697
BASIN_6_SURF_FIRN	6	-20.416	1.39568
BASIN_6_ICE	6	-14.5711	0.727553
BASIN_7_TMASS	6	-3.7302	0.968754
BASIN_7_SURF_FIRN	6	-2.98887	0.808725
BASIN_7_ICE	6	-0.741335	0.680314
BASIN_8_TMASS	6	0	0
BASIN_8_SURF_FIRN	6	0	0
BASIN_8_ICE	6	0	0
ALL_SECTORS_TMASS_INCLUDING_ISLANDS	7	-127.553	3.35477
ALL_SECTORS_SURFMASS_INCLUDING_ISLANDS	7	2.92133	4.00409
ALL_SECTORS_ICEMASS_INCLUDING_ISLANDS	7	-130.474	3.07981
ALL_SECTORS_TMASS	7	-122.22	2.87047
ALL_SECTORS_SURF_FIRN	7	-0.624848	3.93897
ALL_SECTORS_ICE	7	-121.595	2.62733
AP_IMBIE_TMASS	7	-7.38068	2.07804
AP_IMBIE_SURF_FIRN	7	13.3145	2.18014
AP_IMBIE_ICE	7	-20.6952	1.16427
BASIN_2_TMASS	7	23.7988	1.53983
BASIN_2_SURF_FIRN	7	13.6993	1.81772
BASIN_2_ICE	7	10.0995	1.10994
BASIN_3_TMASS	7	-2.46283	1.53512
BASIN_3_SURF_FIRN	7	2.48024	1.46806
BASIN_3_ICE	7	-4.94307	0.575989
BASIN_4_TMASS	7	-136.175	1.73322
BASIN_4_SURF_FIRN	7	-30.1189	2.59295
BASIN_4_ICE	7	-106.056	1.73884
BASIN_5_TMASS	7	-3.58491	1.49608
BASIN_5_SURF_FIRN	7	1.02398	1.56234
BASIN_5_ICE	7	-4.60889	0.698273
BASIN_6_TMASS	7	-1.86953	1.58804
BASIN_6_SURF_FIRN	7	13.4352	1.49957
BASIN_6_ICE	7	-15.3047	0.765403
BASIN_7_TMASS	7	-1.92623	1.02889
BASIN_7_SURF_FIRN	7	-1.14463	0.861935
BASIN_7_ICE	7	-0.7816	0.715651
BASIN_8_TMASS	7	0	0
BASIN_8_SURF_FIRN	7	0	0
BASIN_8_ICE	7	0	0
ALL_SECTORS_TMASS_INCLUDING_ISLANDS	8	-237.636	3.29104
ALL_SECTORS_SURFMASS_INCLUDING_ISLANDS	8	-101.985	3.98571
ALL_SECTORS_ICEMASS_INCLUDING_ISLANDS	8	-135.651	3.19785
ALL_SECTORS_TMASS	8	-229.305	2.7488
ALL_SECTORS_SURF_FIRN	8	-102.888	3.91431
ALL_SECTORS_ICE	8	-126.417	2.72689
AP_IMBIE_TMASS	8	-50.3978	1.87762
AP_IMBIE_SURF_FIRN	8	-28.8574	2.01324
AP_IMBIE_ICE	8	-21.5405	1.20985
BASIN_2_TMASS	8	2.04079	1.25346
BASIN_2_SURF_FIRN	8	-8.50401	1.62823
BASIN_2_ICE	8	10.5448	1.14658
BASIN_3_TMASS	8	-13.1116	1.0746
BASIN_3_SURF_FIRN	8	-7.93182	1.06278
BASIN_3_ICE	8	-5.17974	0.598154
BASIN_4_TMASS	8	-167.836	1.57299
BASIN_4_SURF_FIRN	8	-57.5949	2.55172
BASIN_4_ICE	8	-110.241	1.80655
BASIN_5_TMASS	8	-20.4995	1.18236
BASIN_5_SURF_FIRN	8	-15.6785	1.32094
BASIN_5_ICE	8	-4.82103	0.725178
BASIN_6_TMASS	8	-22.1383	1.49767
BASIN_6_SURF_FIRN	8	-6.23638	1.4002
BASIN_6_ICE	8	-15.9019	0.795695
BASIN_7_TMASS	8	-7.75996	0.928228
BASIN_7_SURF_FIRN	8	-6.94246	0.728504
BASIN_7_ICE	8	-0.817498	0.743892
BASIN_8_TMASS	8	0	0
BASIN_8_SURF_FIRN	8	0	0
BASIN_8_ICE	8	0	0
ALL_SECTORS_TMASS_INCLUDING_ISLANDS	9	-186.815	3.3079
ALL_SECTORS_SURFMASS_INCLUDING_ISLANDS	9	-47.1847	4.03041
ALL_SECTORS_ICEMASS_INCLUDING_ISLANDS	9	-139.63	3.29283
ALL_SECTORS_TMASS	9	-177.056	2.74014
ALL_SECTORS_SURF_FIRN	9	-46.9367	3.96101
ALL_SECTORS_ICE	9	-130.119	2.80716
AP_IMBIE_TMASS	9	-24.6324	1.86735
AP_IMBIE_SURF_FIRN	9	-2.49234	2.01207
AP_IMBIE_ICE	9	-22.1401	1.24649
BASIN_2_TMASS	9	-13.4432	1.25464
BASIN_2_SURF_FIRN	9	-24.3469	1.64594
BASIN_2_ICE	9	10.9037	1.17664
BASIN_3_TMASS	9	-10.4019	1.07179
BASIN_3_SURF_FIRN	9	-5.03994	1.06193
BASIN_3_ICE	9	-5.36198	0.615975
BASIN_4_TMASS	9	-128.579	1.56983
BASIN_4_SURF_FIRN	9	-15.0576	2.59152
BASIN_4_ICE	9	-113.521	1.86102
BASIN_5_TMASS	9	-8.85981	1.17893
BASIN_5_SURF_FIRN	9	-3.90016	1.32603
BASIN_5_ICE	9	-4.95965	0.746821
BASIN_6_TMASS	9	-14.7342	1.48146
BASIN_6_SURF_FIRN	9	1.62346	1.38237
BASIN_6_ICE	9	-16.3577	0.819992
BASIN_7_TMASS	9	-1.03837	0.933442
BASIN_7_SURF_FIRN	9	-0.215643	0.726355
BASIN_7_ICE	9	-0.822725	0.766534
BASIN_8_TMASS	9	0	0
BASIN_8_SURF_FIRN	9	0	0
BASIN_8_ICE	9	0	0
ALL_SECTORS_TMASS_INCLUDING_ISLANDS	10	-235.262	3.32624
ALL_SECTORS_SURFMASS_INCLUDING_ISLANDS	10	-92.7141	4.07122
ALL_SECTORS_ICEMASS_INCLUDING_ISLANDS	10	-142.548	3.36956
ALL_SECTORS_TMASS	10	-221.6	2.73765
ALL_SECTORS_SURF_FIRN	10	-88.8208	4.00125
ALL_SECTORS_ICE	10	-132.779	2.87223
AP_IMBIE_TMASS	10	-35.1679	1.85469
AP_IMBIE_SURF_FIRN	10	-12.5712	2.00479
AP_IMBIE_ICE	10	-22.5967	1.27601
BASIN_2_TMASS	10	-9.30059	1.26069
BASIN_2_SURF_FIRN	10	-20.8327	1.66451
BASIN_2_ICE	10	11.5321	1.20181
BASIN_3_TMASS	10	-11.7462	1.07558
BASIN_3_SURF_FIRN	10	-6.24287	1.06636
BASIN_3_ICE	10	-5.50337	0.630348
BASIN_4_TMASS	10	-165.385	1.57556
BASIN_4_SURF_FIRN	10	-49.1741	2.6285
BASIN_4_ICE	10	-116.211	1.90494
BASIN_5_TMASS	10	-15.5259	1.18383
BASIN_5_SURF_FIRN	10	-10.4758	1.33595
BASIN_5_ICE	10	-5.05007	0.764291
BASIN_6_TMASS	10	-18.3175	1.4602
BASIN_6_SURF_FIRN	10	-1.60051	1.3555
BASIN_6_ICE	10	-16.717	0.839517
BASIN_7_TMASS	10	-1.32449	0.946213
BASIN_7_SURF_FIRN	10	-0.494851	0.727932
BASIN_7_ICE	10	-0.82964	0.784726
BASIN_8_TMASS	10	0	0
BASIN_8_SURF_FIRN	10	0	0
BASIN_8_ICE	10	0	0
ALL_SECTORS_TMASS_INCLUDING_ISLANDS	11	-132.809	3.38304
ALL_SECTORS_SURFMASS_INCLUDING_ISLANDS	11	11.3735	4.13211
ALL_SECTORS_ICEMASS_INCLUDING_ISLANDS	11	-144.183	3.432
ALL_SECTORS_TMASS	11	-130.276	2.78013
ALL_SECTORS_SURF_FIRN	11	3.91804	4.06027
ALL_SECTORS_ICE	11	-134.194	2.92544
AP_IMBIE_TMASS	11	-29.2296	1.87606
AP_IMBIE_SURF_FIRN	11	-6.29517	2.02271
AP_IMBIE_ICE	11	-22.9344	1.2999
BASIN_2_TMASS	11	15.6767	1.27289
BASIN_2_SURF_FIRN	11	3.17609	1.68517
BASIN_2_ICE	11	12.5006	1.22361
BASIN_3_TMASS	11	-9.67851	1.07769
BASIN_3_SURF_FIRN	11	-4.08002	1.06914
BASIN_3_ICE	11	-5.5985	0.641996
BASIN_4_TMASS	11	-107.045	1.60358
BASIN_4_SURF_FIRN	11	11.1171	2.67059
BASIN_4_ICE	11	-118.162	1.94052
BASIN_5_TMASS	11	-10.2802	1.19743
BASIN_5_SURF_FIRN	11	-5.18884	1.35172
BASIN_5_ICE	11	-5.09138	0.77846
BASIN_6_TMASS	11	-16.1437	1.4694
BASIN_6_SURF_FIRN	11	0.860068	1.35708
BASIN_6_ICE	11	-17.0037	0.855282
BASIN_7_TMASS	11	-2.80571	0.961301
BASIN_7_SURF_FIRN	11	-1.9664	0.734147
BASIN_7_ICE	11	-0.839315	0.799372
BASIN_8_TMASS	11	0	0
BASIN_8_SURF_FIRN	11	0	0
BASIN_8_ICE	11	0	0
ALL_SECTORS_TMASS_INCLUDING_ISLANDS	12	-177.437	3.40216
ALL_SECTORS_SURFMASS_INCLUDING_ISLANDS	12	-32.5489	4.16442
ALL_SECTORS_ICEMASS_INCLUDING_ISLANDS	12	-144.888	3.48338
ALL_SECTORS_TMASS	12	-170.57	2.78743
ALL_SECTORS_SURF_FIRN	12	-35.8141	4.09362
ALL_SECTORS_ICE	12	-134.756	2.96964
AP_IMBIE_TMASS	12	-19.5695	1.87902
AP_IMBIE_SURF_FIRN	12	3.60796	2.0299
AP_IMBIE_ICE	12	-23.1774	1.31936
BASIN_2_TMASS	12	5.94399	1.27769
BASIN_2_SURF_FIRN	12	-7.87495	1.69932
BASIN_2_ICE	12	13.8189	1.2435
BASIN_3_TMASS	12	-7.00013	1.08169
BASIN_3_SURF_FIRN	12	-1.35555	1.07284
BASIN_3_ICE	12	-5.64458	0.65151
BASIN_4_TMASS	12	-149.945	1.60797
BASIN_4_SURF_FIRN	12	-30.1916	2.69398
BASIN_4_ICE	12	-119.753	1.96955
BASIN_5_TMASS	12	-3.38423	1.20175
BASIN_5_SURF_FIRN	12	1.72494	1.35724
BASIN_5_ICE	12	-5.10916	0.790047
BASIN_6_TMASS	12	-14.9785	1.47942
BASIN_6_SURF_FIRN	12	2.24713	1.35699
BASIN_6_ICE	12	-17.2257	0.868063
BASIN_7_TMASS	12	-1.20672	0.958769
BASIN_7_SURF_FIRN	12	-0.364107	0.737452
BASIN_7_ICE	12	-0.842611	0.8112
BASIN_8_TMASS	12	0	0
BASIN_8_SURF_FIRN	12	0	0
BASIN_8_ICE	12	0	0
ALL_SECTORS_TMASS_INCLUDING_ISLANDS	13	-1.23783	3.51862
ALL_SECTORS_SURFMASS_INCLUDING_ISLANDS	13	144.407	4.24838
ALL_SECTORS_ICEMASS_INCLUDING_ISLANDS	13	-145.645	3.52671
ALL_SECTORS_TMASS	13	-12.1384	2.90574
ALL_SECTORS_SURF_FIRN	13	123.246	4.17253
ALL_SECTORS_ICE	13	-135.385	3.00755
AP_IMBIE_TMASS	13	25.0967	1.94695
AP_IMBIE_SURF_FIRN	13	48.4523	2.07187
AP_IMBIE_ICE	13	-23.3556	1.33537
BASIN_2_TMASS	13	37.2663	1.31001
BASIN_2_SURF_FIRN	13	22.5602	1.72643
BASIN_2_ICE	13	14.7062	1.26352
BASIN_3_TMASS	13	8.12648	1.08973
BASIN_3_SURF_FIRN	13	13.7915	1.08088
BASIN_3_ICE	13	-5.66503	0.659385
BASIN_4_TMASS	13	-82.628	1.67947
BASIN_4_SURF_FIRN	13	38.4423	2.7395
BASIN_4_ICE	13	-121.07	1.99356
BASIN_5_TMASS	13	22.8136	1.23083
BASIN_5_SURF_FIRN	13	27.9239	1.37843
BASIN_5_ICE	13	-5.1103	0.799648
BASIN_6_TMASS	13	-3.53605	1.51438
BASIN_6_SURF_FIRN	13	13.8665	1.3825
BASIN_6_ICE	13	-17.4026	0.878515
BASIN_7_TMASS	13	5.81918	0.986642
BASIN_7_SURF_FIRN	13	6.66187	0.745443
BASIN_7_ICE	13	-0.842698	0.820876
BASIN_8_TMASS	13	0	0
BASIN_8_SURF_FIRN	13	0	0
BASIN_8_ICE	13	0	0
ALL_SECTORS_TMASS_INCLUDING_ISLANDS	14	-56.2403	8.55956
ALL_SECTORS_SURFMASS_INCLUDING_ISLANDS	14	90.91	8.43781
ALL_SECTORS_ICEMASS_INCLUDING_ISLANDS	14	-147.15	3.56545
ALL_SECTORS_TMASS	14	-49.6201	8.18946
ALL_SECTORS_SURF_FIRN	14	87.1704	8.2811
ALL_SECTORS_ICE	14	-136.791	3.04254
AP_IMBIE_TMASS	14	-5.54162	3.27016
AP_IMBIE_SURF_FIRN	14	18.0774	3.16603
AP_IMBIE_ICE	14	-23.619	1.3488
BASIN_2_TMASS	14	34.8078	3.26004
BASIN_2_SURF_FIRN	14	20.0854	3.2524
BASIN_2_ICE	14	14.7224	1.28734
BASIN_3_TMASS	14	-5.33469	1.45722
BASIN_3_SURF_FIRN	14	0.39206	1.39461
BASIN_3_ICE	14	-5.72675	0.666036
BASIN_4_TMASS	14	-73.5516	5.17791
BASIN_4_SURF_FIRN	14	48.6156	5.33623
BASIN_4_ICE	14	-122.167	2.01413
BASIN_5_TMASS	14	1.48202	2.05341
BASIN_5_SURF_FIRN	14	6.65584	2.06119
BASIN_5_ICE	14	-5.17382	0.807786
BASIN_6_TMASS	14	-10.4303	1.93987
BASIN_6_SURF_FIRN	14	7.16025	1.765
BASIN_6_ICE	14	-17.5905	0.887162
BASIN_7_TMASS	14	3.40664	1.2553
BASIN_7_SURF_FIRN	14	4.26129	0.999123
BASIN_7_ICE	14	-0.854646	0.82883
BASIN_8_TMASS	14	0	0
BASIN_8_SURF_FIRN	14	0	0
BASIN_8_ICE	14	0	0
ALL_SECTORS_TMASS_INCLUDING_ISLANDS	15	-127.899	8.5771
ALL_SECTORS_SURFMASS_INCLUDING_ISLANDS	15	20.4957	8.44954
ALL_SECTORS_ICEMASS_INCLUDING_ISLANDS	15	-148.395	3.59553
ALL_SECTORS_TMASS	15	-118.844	8.20307
ALL_SECTORS_SURF_FIRN	15	19.1195	8.29411
ALL_SECTORS_ICE	15	-137.963	3.0694
AP_IMBIE_TMASS	15	-19.0699	3.28058
AP_IMBIE_SURF_FIRN	15	4.77167	3.17479
AP_IMBIE_ICE	15	-23.8416	1.35958
BASIN_2_TMASS	15	23.8809	3.26939
BASIN_2_SURF_FIRN	15	9.16075	3.26111
BASIN_2_ICE	15	14.7201	1.30393
BASIN_3_TMASS	15	-7.41515	1.45807
BASIN_3_SURF_FIRN	15	-1.64702	1.39858
BASIN_3_ICE	15	-5.76813	0.671499
BASIN_4_TMASS	15	-116.239	5.18412
BASIN_4_SURF_FIRN	15	6.83414	5.34472
BASIN_4_ICE	15	-123.074	2.03067
BASIN_5_TMASS	15	-6.75837	2.05849
BASIN_5_SURF_FIRN	15	-1.52659	2.06856
BASIN_5_ICE	15	-5.23178	0.814489
BASIN_6_TMASS	15	-13.4179	1.9485
BASIN_6_SURF_FIRN	15	4.32799	1.7739
BASIN_6_ICE	15	-17.7459	0.894102
BASIN_7_TMASS	15	1.10642	1.25867
BASIN_7_SURF_FIRN	15	1.97027	0.998899
BASIN_7_ICE	15	-0.863853	0.835215
BASIN_8_TMASS	15	0	0
BASIN_8_SURF_FIRN	15	0	0
BASIN_8_ICE	15	0	0
ALL_SECTORS_TMASS_INCLUDING_ISLANDS	16	-121.743	3.58484
ALL_SECTORS_SURFMASS_INCLUDING_ISLANDS	16	27.6199	4.34475
ALL_SECTORS_ICEMASS_INCLUDING_ISLANDS	16	-149.362	3.61851
ALL_SECTORS_TMASS	16	-109.027	2.96041
ALL_SECTORS_SURF_FIRN	16	29.8476	4.27116
ALL_SECTORS_ICE	16	-138.875	3.08931
AP_IMBIE_TMASS	16	-34.8052	2.01871
AP_IMBIE_SURF_FIRN	16	-10.7831	2.15759
AP_IMBIE_ICE	16	-24.0222	1.36822
BASIN_2_TMASS	16	13.2742	1.32208
BASIN_2_SURF_FIRN	16	-1.45387	1.7773
BASIN_2_ICE	16	14.7281	1.31399
BASIN_3_TMASS	16	-1.98158	1.10427
BASIN_3_SURF_FIRN	16	3.80811	1.122
BASIN_3_ICE	16	-5.78969	0.676048
BASIN_4_TMASS	16	-85.5147	1.68813
BASIN_4_SURF_FIRN	16	38.2764	2.78873
BASIN_4_ICE	16	-123.791	2.0439
BASIN_5_TMASS	16	-10.6154	1.2438
BASIN_5_SURF_FIRN	16	-5.34018	1.41428
BASIN_5_ICE	16	-5.27525	0.820075
BASIN_6_TMASS	16	-20.5523	1.59583
BASIN_6_SURF_FIRN	16	-2.67762	1.48278
BASIN_6_ICE	16	-17.8747	0.899669
BASIN_7_TMASS	16	-3.6375	1.0043
BASIN_7_SURF_FIRN	16	-2.76526	0.759844
BASIN_7_ICE	16	-0.872238	0.840335
BASIN_8_TMASS	16	0	0
BASIN_8_SURF_FIRN	16	0	0
BASIN_8_ICE	16	0	0
ALL_SECTORS_GIA	NA	28.3912	0.725512
AP_IMBIE_GIA	NA	1.25399	0.14668
BASIN_2_GIA	NA	15.2966	0.45276
BASIN_3_GIA	NA	2.20096	0.159334
BASIN_4_GIA	NA	9.63966	0.370775
BASIN_5_GIA	NA	0.401671	0.0618659
BASIN_6_GIA	NA	0.589453	0.0519441
BASIN_7_GIA	NA	0.262869	0.0923951
BASIN_8_GIA	NA	0	0
